# Supplementary material for: “There’s Something Very Wrong with the System in This Country”: Multiracial Organizations and Their Responses to Racial Marginalization
Source: MDPI journal article supplement (doi:10.3390/socsci11050226), 2022-05-23
Supplement: s1 [file s1]

Archive with 1 entries (1 files):
- socsci-1448779-supplementary.pdf
