# Supplementary material for: “There’s Something Very Wrong with the System in This Country”: Multiracial Organizations and Their Responses to Racial Marginalization
Source: MDPI journal article supplement (doi:10.3390/socsci11050226), 2022-05-23
Supplement: s1 [file s1 › socsci-1448779-supplementary.pdf]

**Table S1.** Sample Characteristics <sup>1</sup>.

|                                            | Frequency |
|--------------------------------------------|-----------|
| <u>Organizational Characteristics</u>      |           |
| <b>Type of Organization</b>                |           |
| Campus Based                               | 8         |
| Public                                     | 11        |
| Total                                      | 19        |
| <b>Racial Scope of Targeted Membership</b> |           |
| All Groups welcome                         | 17        |
| Targets specific Multiracial group         | 2         |
| Total                                      |           |
| <u>Respondent Characteristics (N=21)</u>   |           |
| <b>Race (Self-Identified)</b>              |           |
| Multiracial                                | 17        |
| Asian                                      | 1         |
| Black                                      | 2         |
| White                                      | 1         |
| Total                                      | 21        |
| <b>Gender (Self-identified)</b>            |           |
| Female                                     | 14        |
| Male                                       | 7         |
| Total                                      | 21        |

<sup>1</sup> One respondent was interviewed per organization with the exception of two organizations where two officers were interviewed.

Race reports reflects identity that is described throughout the interview. "Multiracial" encompasses any respondent who described their identity as "mixed" or "multiracial" at any point of the interview. All others consistently referred to themselves as members of single-race groups.
